# Supplementary material for: Factors influencing the growth and topography of nanoscale films fabricated by ROMP-mediated continuous assembly of polymers
Source: Royal Society of Chemistry journal article supplement (doi:10.1039/c2py20692g), 2012-09-13
Supplement: c2py20692g.pdf [file c2py20692g.pdf]

## **Supporting Information**

# **Factors Influencing the Growth and Topography of Nanoscale Films Fabricated by ROMP-Mediated Continuous Assembly of Polymers**

*Stefanie N. Guntari, Tor K. Goh, Anton Blencowe, Edgar H. H. Wong, Frank Caruso,\* Greg  
G. Qiao\**

Department of Chemical and Biomolecular Engineering, The University of Melbourne,  
Parkville, Victoria 3010, Australia

**S1:** *Topography of CAP<sub>ROMP</sub> films prepared using different catalysts, as imaged by AFM.*

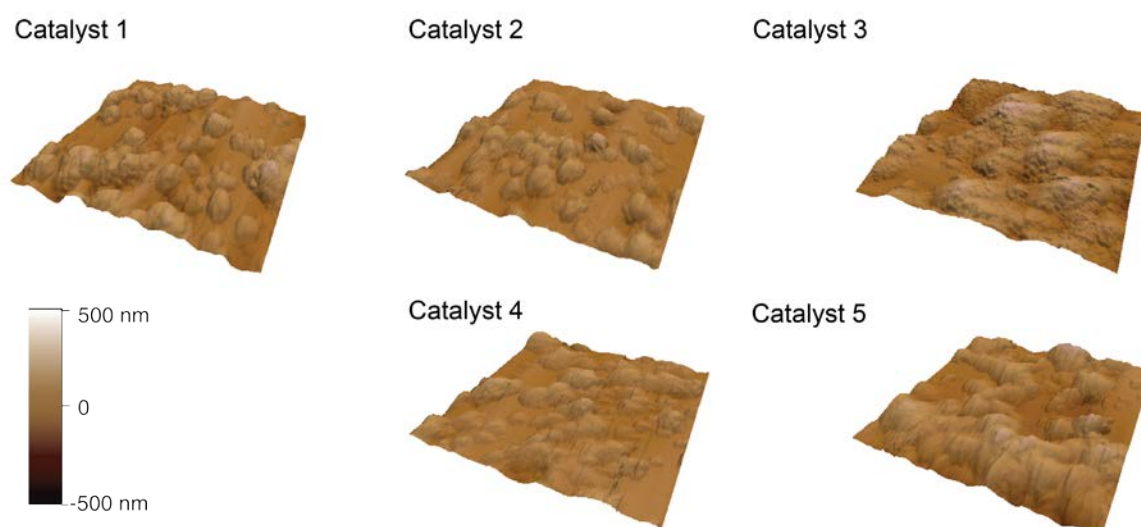

**Fig. S1** 3D-height mode images of CAP<sub>ROMP</sub> **P1** films obtained using different ROMP catalysts (25h). Only films obtained using catalyst **3** were observed to have high surface coverage within the range of analysis.

**S2:** Topography of CAP<sub>ROMP</sub> films prepared using different catalyst concentrations, as imaged by AFM.

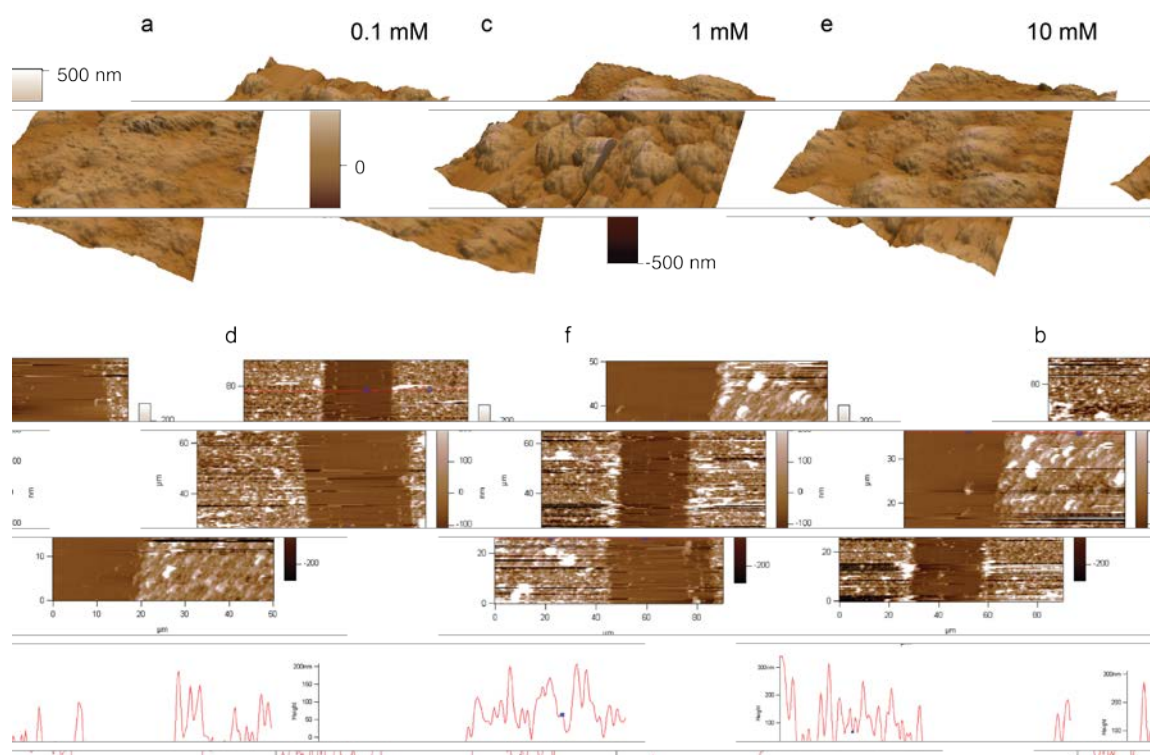

**Fig. S2** 3D-height mode images of CAP<sub>ROMP</sub> **P1** films obtained after 20 h using catalyst **3** at concentrations of (a) 0.1, (c) 1, and (e) 10 mM. AFM 2D (x,y) images showing a scratched zone of the CAP<sub>ROMP</sub> **P1** films obtained using concentrations of (b) 0.1 (7 h), (d) 1 (5 h), and (f) 10 mM (20 h). Scratch profiles ((b), (d), (f)) indicate that all films formed at different catalyst concentrations were observed to have high surface coverage within the range of analysis.

**S3:** Comparison of CAP<sub>ROMP</sub> film thickness by ellipsometry and AFM.

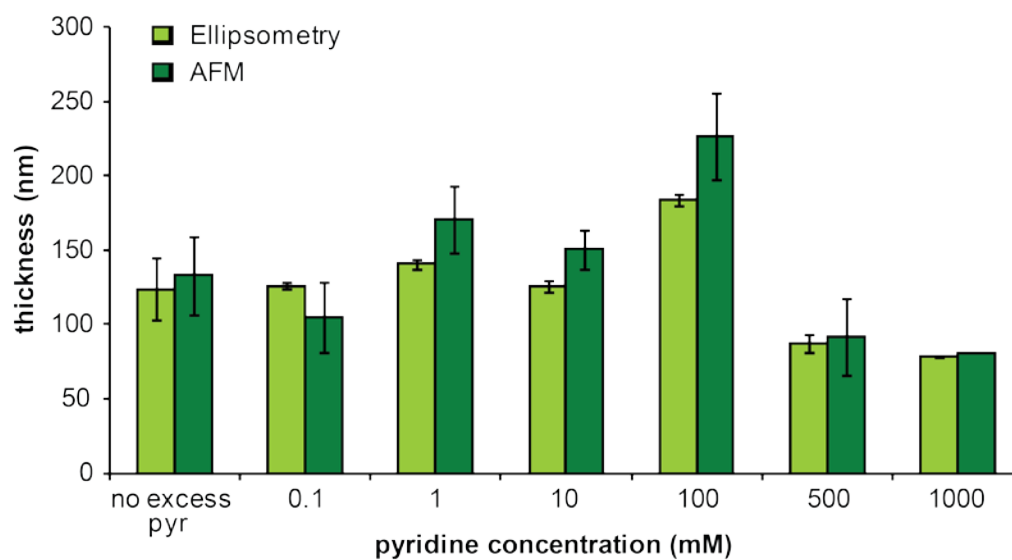

**Fig. S3** Film thicknesses of CAP<sub>ROMP</sub> P1 films prepared using different concentrations of additional pyridine added to the system, as measured by ellipsometry and AFM scratch analysis. Good agreement between ellipsometry and AFM analysis was observed.
